# Supplementary material
Source: PubMed Central journal article supplement (PMC4926983)

**Supplemental List:**

Supplemental Table 1. Analysis cohort size by region.

Supplemental Table 2. Prescribed ESA dose (scaled by post-dialysis body weight) quantiles by region, route of administration, and drug type.

Supplemental Figures 1A-B. Temporal trends and 95% confidence bands for ESA prescription (A), prescribed ESA dose/hemoglobin ratio (B), by region and month, August 2010 to April 2013. Markers indicate monthly observed means. Regional trend lines and confidence bands were estimated using a restricted cubic spline model with 7 knots. Vertical lines indicate significant changes to U.S. dialysis reimbursement policy or regulatory updates. Abbreviations: PPS, Medicare ESRD Prospective Payment System; QIP, Medicare ESRD Quality Incentive Payment program; ESA, erythropoiesis-stimulating agent. ESA dose conversions: subcutaneous epoetin, x1.15; darbepoetin (IV or subcutaneous), x250 u/mcg; peglyated epoetin beta (IV or subcutaneous), x208 u/mcg. Footnotes: <sup>1</sup>Introduction of revised PPS, January 2011; <sup>2</sup>ESA label revision, June 2011; <sup>3</sup>ESRD QIP proposed rule, July 2011.

**Supplemental Table 1. Analysis cohort size by region.**

| Month/year <sup>2</sup> | Europe <sup>1</sup> |          | Japan      |          | U.S.       |                  |                      |
|-------------------------|---------------------|----------|------------|----------|------------|------------------|----------------------|
|                         | Facilities          | Patients | Facilities | Patients | Facilities | Patients (Black) | Patients (Non-black) |
| <b>08/2010</b>          | 72                  | 2187     | 58         | 1709     | 93         | 1053             | 2451                 |
| <b>12/2011</b>          | 72                  | 2103     | 57         | 1673     | 108        | 1261             | 2797                 |
| <b>04/2013</b>          | 72                  | 2014     | 55         | 1681     | 94         | 1099             | 2199                 |

<sup>1</sup>'Europe' includes DOPPS facility samples in Germany, Italy, Spain, and the UK.

<sup>2</sup>Facility sample transitioned from DOPPS 4 to DOPPS 5 during January-April 2012.

**Supplemental Table 2. Prescribed ESA dose (scaled by post-dialysis body weight) quantiles by region, route of administration, and drug type.**

| Drug/route           | Europe   |         |      |      |      |      |      | Japan        |      |      |      |      |      |
|----------------------|----------|---------|------|------|------|------|------|--------------|------|------|------|------|------|
|                      | Date     | N       | P10  | P25  | P50  | P75  | P90  | N            | P10  | P25  | P50  | P75  | P90  |
| IV epoetin (u/wk)    | 08/2010  | 745     | 31   | 52   | 94   | 166  | 261  | 415          | 18   | 33   | 56   | 92   | 137  |
|                      | 12/2011  | 422     | 26   | 48   | 84   | 165  | 287  | 466          | 14   | 31   | 60   | 104  | 162  |
|                      | 04/2013  | 706     | 27   | 51   | 88   | 139  | 235  | 372          | 20   | 39   | 64   | 106  | 141  |
| SQ epoetin (u/wk)    | 08/2010  | 80      | 31   | 51   | 88   | 154  | 270  | [N <10]      |      |      |      |      |      |
|                      | 12/2011  | 62      | 31   | 52   | 95   | 137  | 258  | [N <10]      |      |      |      |      |      |
|                      | 04/2013  | 52      | 26   | 43   | 64   | 103  | 160  | 44           | 23   | 39   | 71   | 96   | 125  |
| Darbepoetin (mcg/wk) | 08/2010  | 544     | 0.13 | 0.23 | 0.46 | 0.77 | 1.33 | 416          | 0.13 | 0.22 | 0.38 | 0.62 | 1.01 |
|                      | 12/2011  | 308     | 0.13 | 0.25 | 0.44 | 0.76 | 1.31 | 515          | 0.15 | 0.23 | 0.36 | 0.61 | 0.98 |
|                      | 04/2013  | 388     | 0.13 | 0.22 | 0.39 | 0.60 | 0.92 | 644          | 0.16 | 0.24 | 0.40 | 0.63 | 0.87 |
| Mircera (mcg/wk)     | 08/2010  | 160     | 0.22 | 0.32 | 0.48 | 0.71 | 1.02 | [N <10]      |      |      |      |      |      |
|                      | 12/2011  | 90      | 0.17 | 0.25 | 0.49 | 0.82 | 1.31 | [N <10]      |      |      |      |      |      |
|                      | 04/2013  | 12      | 0.14 | 0.19 | 0.56 | 0.84 | 1.40 | 32           | 0.24 | 0.40 | 0.64 | 0.94 | 1.12 |
|                      | US Black |         |      |      |      |      |      | US Non-black |      |      |      |      |      |
| Drug/route           | Date     | N       | P10  | P25  | P50  | P75  | P90  | N            | P10  | P25  | P50  | P75  | P90  |
| IV epoetin (u/wk)    | 08/2010  | 805     | 49   | 85   | 172  | 318  | 563  | 1706         | 42   | 89   | 167  | 310  | 578  |
|                      | 12/2011  | 848     | 37   | 64   | 132  | 233  | 398  | 1521         | 38   | 62   | 118  | 220  | 374  |
|                      | 04/2013  | 812     | 35   | 56   | 106  | 223  | 402  | 1357         | 25   | 48   | 98   | 185  | 346  |
| SQ epoetin (u/wk)    | 08/2010  | 18      | 65   | 96   | 147  | 221  | 296  | 33           | 24   | 52   | 95   | 133  | 166  |
|                      | 12/2011  | 21      | 27   | 56   | 82   | 133  | 136  | 75           | 32   | 46   | 85   | 155  | 218  |
|                      | 04/2013  | [N <10] |      |      |      |      |      | 36           | 29   | 68   | 94   | 132  | 203  |
| Darbepoetin (mcg/wk) | 08/2010  | [N <10] |      |      |      |      |      | 97           | 0.16 | 0.20 | 0.40 | 0.72 | 0.93 |
|                      | 12/2011  | [N <10] |      |      |      |      |      | 148          | 0.09 | 0.15 | 0.37 | 0.80 | 1.31 |
|                      | 04/2013  | [N <10] |      |      |      |      |      | 88           | 0.07 | 0.14 | 0.24 | 0.46 | 0.74 |
| Mircera (mcg/wk)     | 08/2010  | [N <10] |      |      |      |      |      | [N <10]      |      |      |      |      |      |
|                      | 12/2011  | [N <10] |      |      |      |      |      | [N <10]      |      |      |      |      |      |

04/2013

[N &lt;10]

[N &lt;10]

**Supplemental Figures 1A-B. Temporal trends and 95% confidence bands for ESA prescription (A), prescribed ESA dose/hemoglobin ratio (B), by region and month, August 2010 to April 2013.**

Markers indicate monthly observed means. Regional trend lines and confidence bands were estimated using a restricted cubic spline model with 7 knots. Vertical lines indicate significant changes to U.S. dialysis reimbursement policy or regulatory updates. Abbreviations: PPS, Medicare ESRD Prospective Payment System; QIP, Medicare ESRD Quality Incentive Payment program; ESA, erythropoiesis-stimulating agent. ESA dose conversions: subcutaneous epoetin, x1.15; darbepoetin (IV or subcutaneous), x250 u/mcg; peglyated epoetin beta (IV or subcutaneous), x208 u/mcg. Footnotes: <sup>1</sup>Introduction of revised PPS, January 2011; <sup>2</sup>ESA label revision, June 2011; <sup>3</sup>ESRD QIP proposed rule, July 2011.

(A) Proportion of patients prescribed an ESA

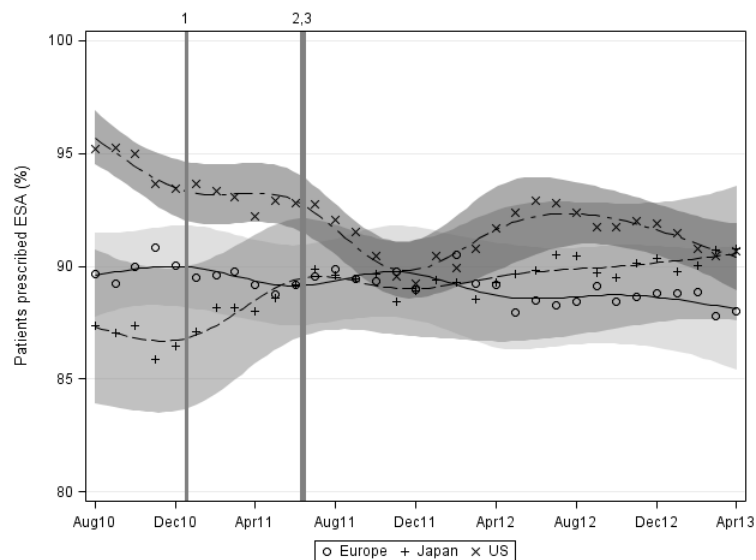

(B) Prescribed ESA dose/hemoglobin ratio

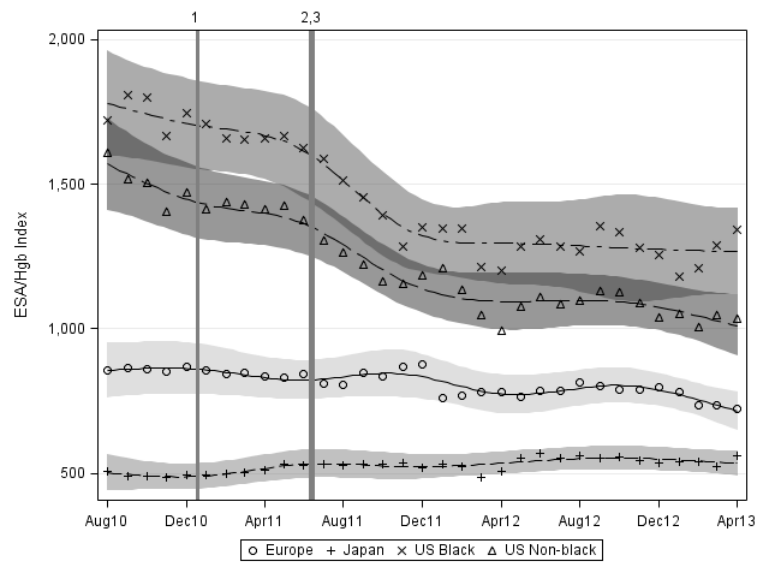

Supplement: ASN.2015060673_ASN2015060673SupplementaryData.pdf [file ASN.2015060673_ASN2015060673SupplementaryData.pdf]
